# Supplementary material for: Efficient photodegradation of carbamazepine by organocatalysts incorporating a third component with a more complementary absorption spectrum
Source: Royal Society of Chemistry journal article supplement (doi:10.1039/d4mh01030b), 2024-01-01
Supplement: d4mh01030b1.pdf [file d4mh01030b1.pdf]

## Supplementary Information

### Efficient photodegradation of carbamazepine by organocatalysts incorporating a third component with a more complementary absorption spectrum

Min Long <sup>a,b,c</sup>, Ciyuan Huang <sup>a,c</sup>, Xiao Huang <sup>a\*</sup>, Linji Yang <sup>a</sup>, Liangsheng Chen <sup>a</sup>,  
Ke Sun <sup>b</sup>, Caiyun Wang <sup>c\*</sup>, Liying Zhang <sup>c\*</sup>, Libin Zhang <sup>a</sup>, Songlin Cai <sup>a</sup>,  
Shangfei Yao <sup>a</sup>, Hongxiang Zhu <sup>a</sup>, Tao Yang <sup>d</sup>, Bingsuo Zou <sup>a</sup>, Tao Liu <sup>a,b\*</sup>

a. Guangxi Key Laboratory of Processing for Non-ferrous Metals and Featured Materials, State Key Laboratory of Featured Metal Materials and Life-cycle Safety for Composite Structures, School of Resources, Environment and Materials, School of Chemistry and Chemical Engineering, Guangxi University, Nanning 530004, P. R. China.  
[huangxiao@gxu.edu.cn](mailto:huangxiao@gxu.edu.cn), [liutaozhx@gxu.edu.cn](mailto:liutaozhx@gxu.edu.cn)

b. Department of Biochemistry and Cell Biology, YouJiang Medical University for Nationalities, Baise City, Guangxi Zhuang Autonomous Region 533000, China.

c. Guangxi Vocational & Technical Institute of Industry, Nanning 530001 Guangxi, P. R. China. [wangcaiyun@gxgy.edu.cn](mailto:wangcaiyun@gxgy.edu.cn), [425064953@qq.com](mailto:425064953@qq.com)

d. Centre for Mechanical Technology and Automation, Department of Mechanical Engineering, University of Aveiro, Portugal

e. These authors contributed equally.

\*Corresponding author.

## 1 **Text S1 Photocatalyst synthesis**

2 The preparation of PM6 is referred to Zhang et al. <sup>1</sup>: First, BDT-F (450 mg, 0.5 mmol)  
3 and BDD (383 mg, 0.5 mmol) are dissolved in 12 ml of toluene and placed in a 50 ml  
4 double-neck round-bottom flask. The reaction vessel is purged with argon for 20 minutes  
5 to remove oxygen. Then, 25 mg of Pd(PPh<sub>3</sub>)<sub>4</sub> is added as a catalyst, and the flask is flushed  
6 with argon for another 20 minutes. The mixture is heated to reflux and maintained for 12  
7 hours. After cooling to room temperature, the reaction mixture is poured into 200 ml of  
8 methanol to precipitate the product, which is then filtered using a Soxhlet thimble. Soxhlet  
9 extraction is carried out sequentially with methanol, hexane, and chloroform. The polymer  
10 is recovered from the chloroform fraction by precipitation in methanol. Finally, the solid  
11 product is dried under vacuum.

12 The preparation of Y6 is referred to Yuan et al. <sup>2</sup>: Compound (12, 13-bis(2-ethylhex  
13 yl)-3, 9-diundecyl-12, 13-dihydro[1, 2, 5]thiadiazole[3, 4-e]thieno[2'', 3'':4, 5]thieno[2', 3  
14 ':4, 5]pyrrolo[3, 2-g]thieno[2', 3':4, 5]thieno[3, 2-b]indole-2, 10-dicarbaldehyde (0.15g, 0.  
15 15 mmol), 2-(5, 6-difluoro-3-oxo-2,3-dihydro-1H-inden-1-ylidene)malononitrile) (0.21g,  
16 0.91mmol), pyridine (1 mL), and chloroform (45 mL) were dissolved in a round-bottom f  
17 lask under a nitrogen atmosphere. The solution was stirred at 65 °C overnight. After the r  
18 eaction mixture was cooled to room temperature, it was poured into methanol, and the res  
19 ulting precipitate was filtered. The residue was purified by column chromatography on sil  
20 ica gel, using a 1:1 (v/v) mixture of dichloromethane and petroleum ether as the eluent, yi  
21 elding a dark blue solid Y6.

22 The preparation of ITCPTC is referred to Xie et al. <sup>3</sup>: IT-CHO (129 mg, 0.12 mmol),  
23 CPTCN (100 mg, 0.5 mmol), and chloroform (10 mL) were placed in a two-neck round-

24 bottom flask. The mixture was purged with argon for 30 minutes to remove oxygen. Then,  
25 pyridine (0.1 mL) was added, and the reaction was refluxed at 80°C for 12 hours. After  
26 cooling to room temperature, the mixture was poured into 100 mL of methanol, and the  
27 resulting precipitate was filtered. The residue was purified by column chromatography on  
28 silica gel using petroleum ether/dichloromethane (1:1, v/v) as the eluent, yielding a dark  
29 blue solid (157 mg, 91% yield).

### 30 **Text S2 Analysis and Characterizations**

31 The surface morphology of the materials was visualized using scanning electron  
32 microscopy (SEM, Hitachi Regulus8100) and atomic force microscopy (AFM, Bruker  
33 Dimension ICON). The chemical composition of the material was analyzed using Raman  
34 spectroscopy (Raman, inVia Reflex, UK). The Brunauer–Emmett–Teller (BET) surface  
35 area was determined through nitrogen adsorption-desorption isotherms using the  
36 Micromeritics ASAP2460 system. The Ultraviolet-visible diffuse reflectance spectroscopy  
37 (UV-vis DRS, UV-2700i, Shimadzu, Japan) was utilized to examine the optical absorption  
38 characteristics of the photocatalyst in the UV-Vis range. The concentration of total organic  
39 carbon (TOC) was measured by a TOC analyzer (Shimadzu TOC-VSH, Shimadzu, Japan).  
40 Photoluminescence emission spectra (PL) and nanosecond timescale fluorescence decay  
41 kinetics of the photocatalyst were provided by a steady-state/transient fluorescence  
42 spectrometer (Edinburgh Instruments Ltd, FLS1000, UK). Absorbance measurements were  
43 conducted using a UV detector (Shimadzu Corporate Management China Ltd. UV-2700)  
44 at a wavelength of 285 nm. The identification of intermediate species during the  
45 degradation of carbamazepine was performed using liquid chromatography-mass  
46 spectrometry (LC-MS, Thermo Q-Exactive, USA). The charge transfer capability of the

47 photocatalyst was assessed through electrochemical impedance spectroscopy (EIS) and  
 48 photocurrent response (PCR) tests using the CHI660E electrochemical workstation  
 49 (Shanghai Chenhua Instruments Co., Ltd.). The types of free radicals were identified using  
 50 electron spin resonance (ESR, Bruker-A300, Germany). The photogenerated charge  
 51 behavior was measured using the PL-SPV1000 Stable surface photovoltage (SPV)  
 52 spectrometer (Beijing Perfectlight Technology Co., Ltd.).

53

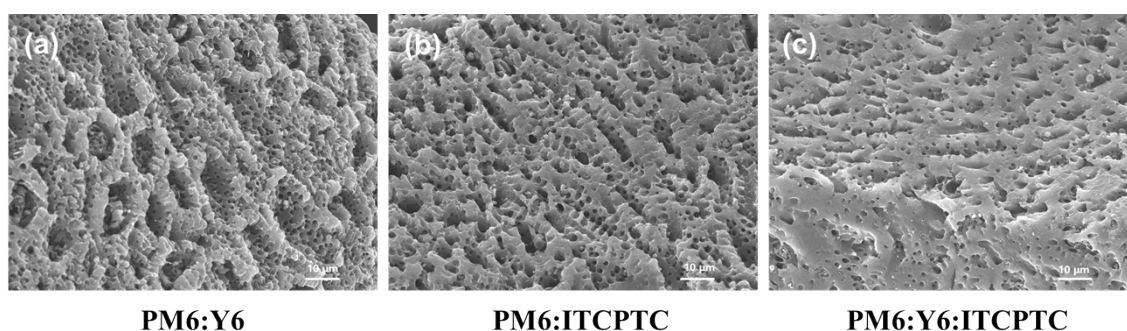

54

55 **Fig.S1.** SEM images. (a) PM6:Y6, (b) PM6:ITCPTC, and (c) PM6:Y6:ITCPTC.

56

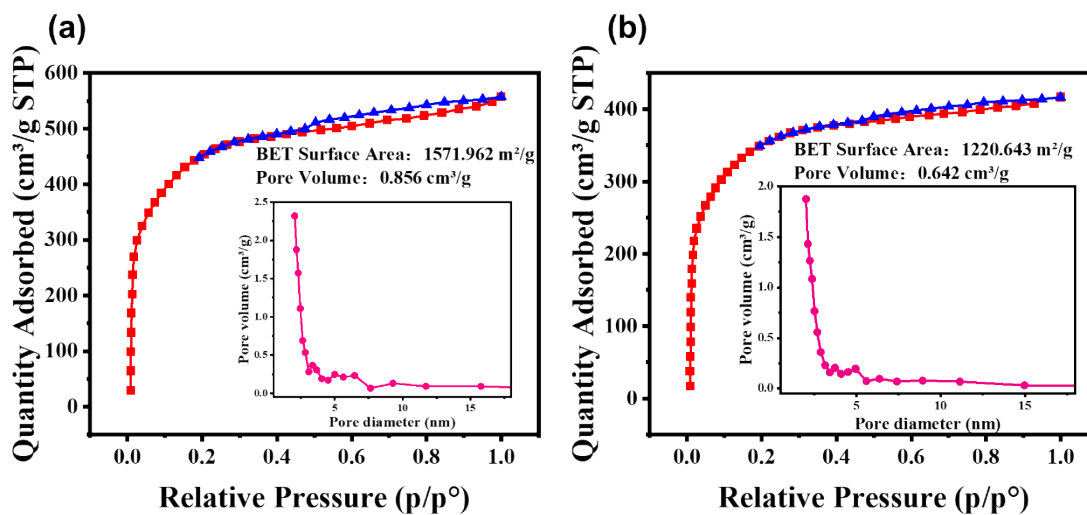

57

58 **Fig.S2.** N<sub>2</sub> adsorption-desorption isotherms of (a) pure CSC and (b) CSC-loaded  
 59 PM6:Y6:ITCPTC.

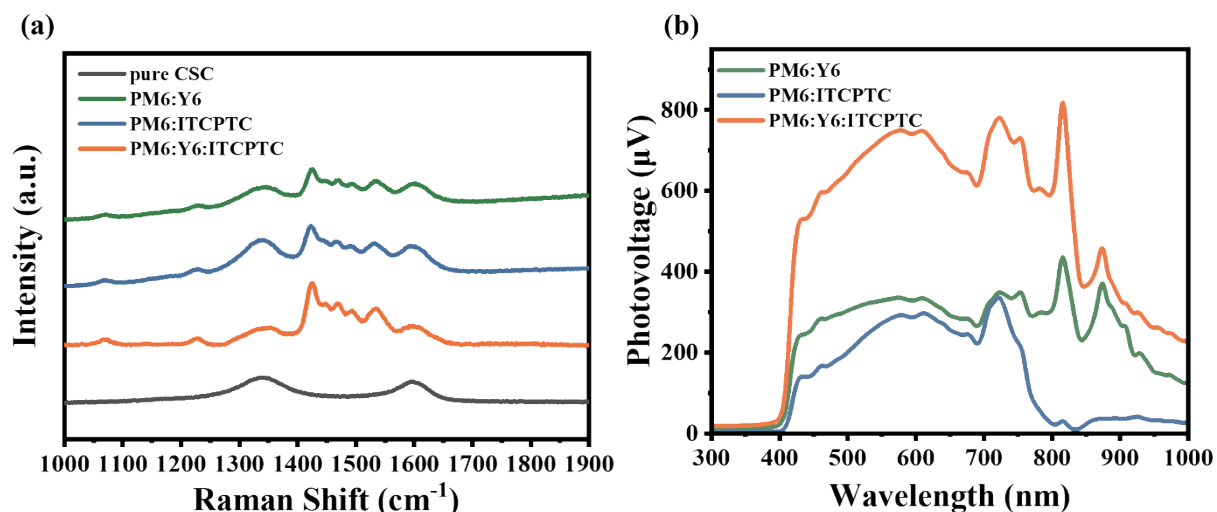

60

61

**Fig.S3.** The Raman (a) and SPV (b) spectra of the materials.

62

**Table S1.** The first-order kinetics constant ( $k_1$ ) and the second kinetics constant ( $k_2$ ) for

63

photodegradation of different samples.

| Samples       | $k_1$ (min <sup>-1</sup> ) | $R_1^2$ | $k_2$ (g·(mg·min) <sup>-1</sup> ) | $R_2^2$ |
|---------------|----------------------------|---------|-----------------------------------|---------|
| PM6:Y6        | 0.10111                    | 0.95995 | 0.13184                           | 0.9962  |
| PM6:ITCPTC    | 0.10436                    | 0.95335 | 0.06385                           | 0.99896 |
| PM6:Y6:ITCPTC | 0.20418                    | 0.8644  | 0.02477                           | 0.99397 |

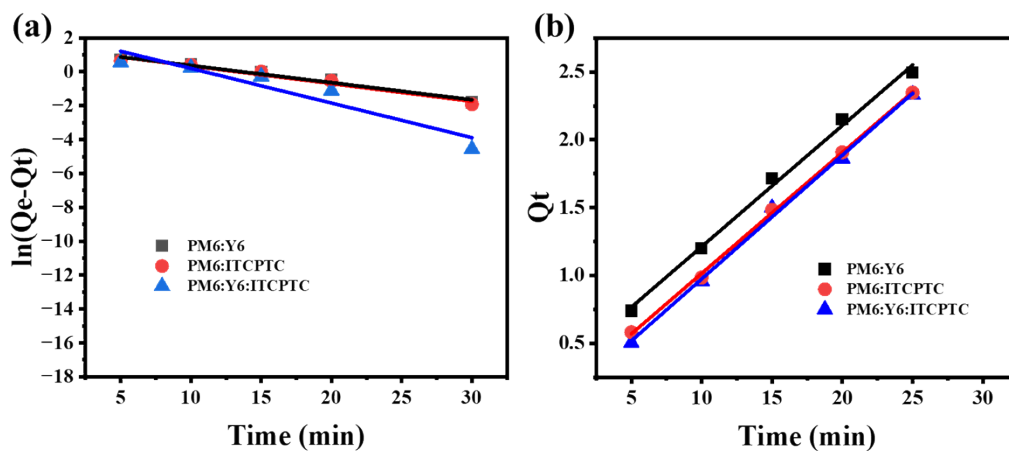

64

65

**Fig.S4.** Pseudo-first-order kinetics (a) and pseudo-second-order kinetics (b) of

66

carbamazepine degradation for the prepared samples.

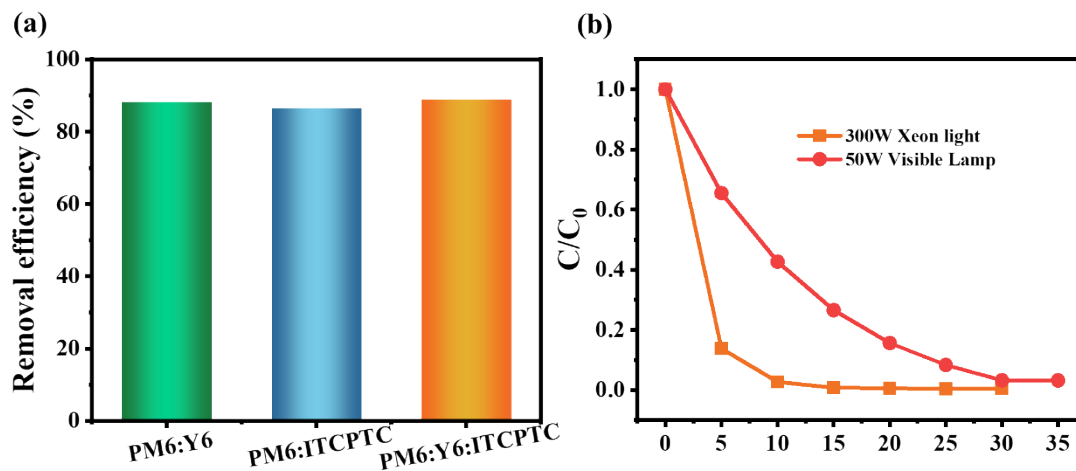

67

68 **Fig.S5.** TOC removal efficiencies using various photocatalysts (a). Comparison of

69 PM6:Y6:ITCPTC degradation of carbamazepine under different light intensities (b).

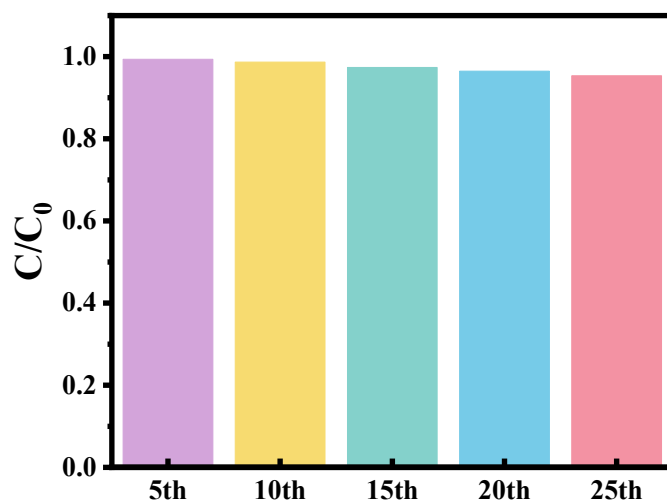

70

71 **Fig. S6.** Recycling tests of PM6:Y6:ITCPTC photocatalyst for carbamazepine

72

degradation.

73

74 **Table S2.** Photocatalytic performance comparison of carbamazepine over various  
 75 photocatalysts under 300 W Xenon light source.

| Photocatalyst                                                                                                                           | Carbamazepine concentration (mg/L) | Catalyst dosage (g/L) | Reaction time (min) | Removal (%)  | Kinetic rate (min <sup>-1</sup> ) | Ref.              |
|-----------------------------------------------------------------------------------------------------------------------------------------|------------------------------------|-----------------------|---------------------|--------------|-----------------------------------|-------------------|
| Single-atom Ba embedded g-C <sub>3</sub> N <sub>4</sub> (MBs) 20                                                                        | 1                                  | 0.4                   | 60                  | ~100         | 0.0485                            | 4                 |
| 10% novel Ag <sub>3</sub> PO <sub>4</sub> modified tubular porous carbon nitride (Ag <sub>3</sub> PO <sub>4</sub> @TPCN <sub>12</sub> ) | 2                                  | 0.5                   | 45                  | ~100         | 0.0927                            | 5                 |
| 0.1 wt% Au-BiOBr                                                                                                                        | 5                                  | 1                     | 30                  | 95.8         | 0.0901                            | 6                 |
| 0.1 La doped BiFeO <sub>3</sub> composites (La-BFOs)                                                                                    | 5                                  | 0.2                   | 30                  | 94.5         | 0.101                             | 7                 |
| Defective TiO <sub>2</sub>                                                                                                              | 10                                 | 0.5                   | 300                 | 69.3         | 0.0034                            | 8                 |
| Meso-Bi <sub>12</sub> O <sub>17</sub> Cl <sub>2</sub> /BiOCl-O <sub>v</sub>                                                             | 10                                 | 1                     | 30                  | 83           | unknown                           | 9                 |
| <b>PM6:Y6:ITCPTC</b>                                                                                                                    | <b>10</b>                          | <b>0.1</b>            | <b>20</b>           | <b>99.58</b> | <b>0.02477</b>                    | <b>This study</b> |

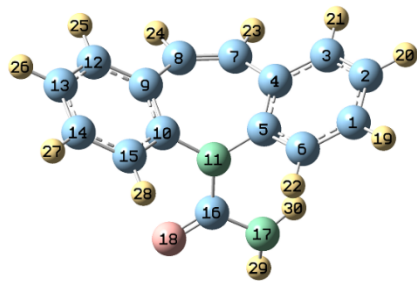

| Atom | Charge (0) ( $e/\text{\AA}^3$ ) | Charge (+1) ( $e/\text{\AA}^3$ ) | Charge (-1) ( $e/\text{\AA}^3$ ) | $f^0$          | $f^+$    | $f^-$    |
|------|---------------------------------|----------------------------------|----------------------------------|----------------|----------|----------|
| C1   | -0.2342                         | -0.33439                         | -0.15857                         | <b>0.08791</b> | 0.10019  | 0.07563  |
| C2   | -0.23607                        | -0.26074                         | -0.21011                         | 0.025315       | 0.02467  | 0.02596  |
| C3   | -0.21163                        | -0.24786                         | -0.17988                         | 0.03399        | 0.03623  | 0.03175  |
| C4   | -0.07499                        | -0.10586                         | -0.06523                         | 0.020315       | 0.03087  | 0.00976  |
| C5   | 0.14942                         | 0.09943                          | 0.17322                          | 0.036895       | 0.04999  | 0.0238   |
| C6   | -0.23481                        | -0.24264                         | -0.23307                         | 0.004785       | 0.00783  | 0.00174  |
| C7   | -0.22579                        | -0.31247                         | -0.13199                         | <b>0.09024</b> | 0.08668  | 0.0938   |
| C8   | -0.19874                        | -0.31491                         | -0.13547                         | <b>0.08972</b> | 0.11617  | 0.06327  |
| C9   | -0.08265                        | -0.08494                         | -0.04599                         | 0.019475       | 0.00229  | 0.03666  |
| C10  | 0.18622                         | 0.14753                          | 0.21536                          | 0.033915       | 0.03869  | 0.02914  |
| N11  | -0.52174                        | -0.50484                         | -0.45255                         | 0.026145       | -0.0169  | 0.06919  |
| C12  | -0.20923                        | -0.24753                         | -0.17782                         | 0.034855       | 0.0383   | 0.03141  |
| C13  | -0.23709                        | -0.25579                         | -0.20765                         | 0.02407        | 0.0187   | 0.02944  |
| C14  | -0.22721                        | -0.31187                         | -0.13609                         | <b>0.08789</b> | 0.08466  | 0.09112  |
| C15  | -0.21484                        | -0.2226                          | -0.21516                         | 0.00372        | 0.00776  | -0.00032 |
| C16  | 0.83174                         | 0.83227                          | 0.81974                          | -0.006265      | -0.00053 | -0.012   |
| N17  | -0.898                          | -0.90548                         | -0.87374                         | 0.01587        | 0.00748  | 0.02426  |
| O18  | -0.64686                        | -0.6791                          | -0.5865                          | 0.0463         | 0.03224  | 0.06036  |

**Fig. S7.** chemical structure (upper) and Fukui index of carbamazepine (lower).



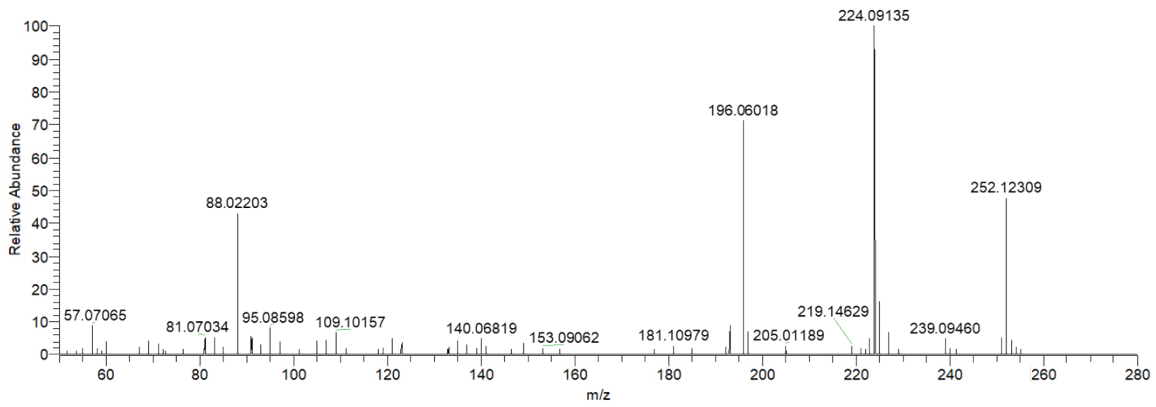

81

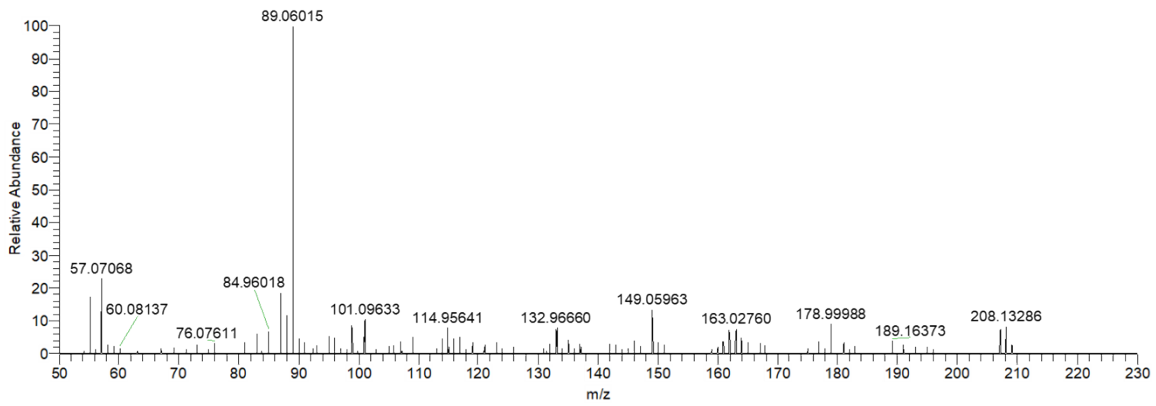

82

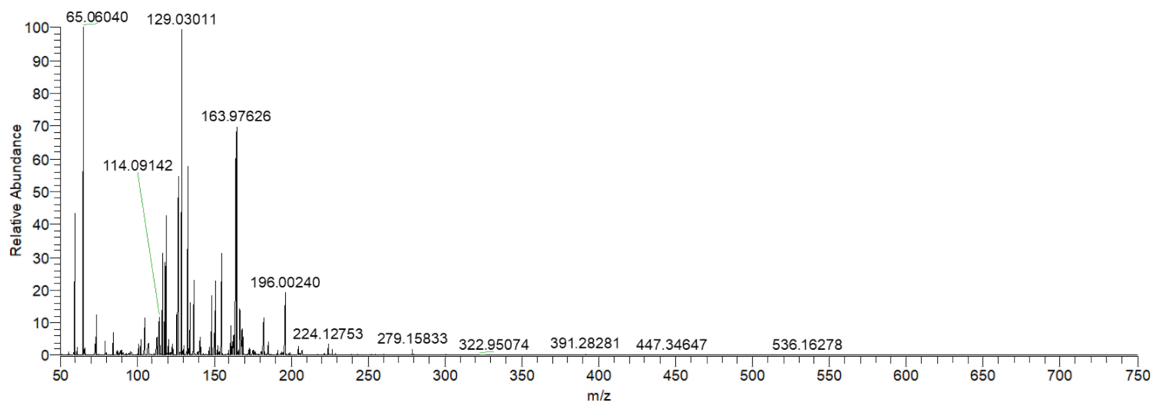

83

84 **Fig. S8.** LCMS (ESI) data of degraded carbamazepine solutions scanned in the range of

85 50-750 m/z show signals of intermediate formation of carbamazepine.

86

## 87 References

- 88 1. M. Zhang, X. Guo, W. Ma, H. Ade and J. Hou, *Advanced Materials*, 2015, **27**, 4525-4660.
- 89 2. J. Yuan, Y. Zhang, L. Zhou, G. Zhang, H.-L. Yip, T.-K. Lau, X. Lu, C. Zhu, H. Peng, P. A.  
90 Johnson, M. Leclerc, Y. Cao, J. Ulanski, Y. Li and Y. Zou, *Joule*, 2019, **3**, 1140-1151.
- 91 3. D. Xie, T. Liu, W. Gao, C. Zhong, L. Huo, Z. Luo, K. Wu, W. Xiong, F. Liu, Y. Sun and C. Yang,  
92 *Solar RRL*, 2017, **1**, 1700044.
- 93 4. J. Liang, W. Zhang, Z. Zhao, W. Liu, J. Ye, M. Tong and Y. Li, *Journal of Hazardous Materials*,  
94 2021, **416**, 125936.
- 95 5. J. Li, W. Huang, L. Yang, G. Gou, C. Zhou, L. Li, N. Li, C. Liu and B. Lai, *Chemical Engineering*  
96 *Journal*, 2022, **432**, 133588.
- 97 6. J. Hu, Y. Chen, Y. Zhou, L. Zeng, Y. Huang, S. Lan and M. Zhu, *Applied Catalysis B:*  
98 *Environmental*, 2022, **311**, 121369.
- 99 7. S. Lan, C. Yu, F. Sun, Y. Chen, D. Chen, W. Mai and M. Zhu, *Nano Energy*, 2022, **93**, 106792.
- 100 8. M. Jahdi, E. N. Nxumalo, S. D. Mhlanga, M. Orlandi and A. Miotello, *Materials Science in*  
101 *Semiconductor Processing*, 2023, **157**, 107305.
- 102 9. W. Li, Z. Liu, Y. Dong, L. Wang, Z. Liu, L. Zhang and Z.-A. Qiao, *Chemical Engineering Journal*,  
103 2022, **450**, 137897.
